# Supplementary material for: MODEL FOR SIMULATING FLOODS IN RIVERS.
Source: Springer Nature journal article supplement (doi:10.1186/s12872-016-0357-5), 1985-01-01
Supplement: MOESM1 [file 10649734]

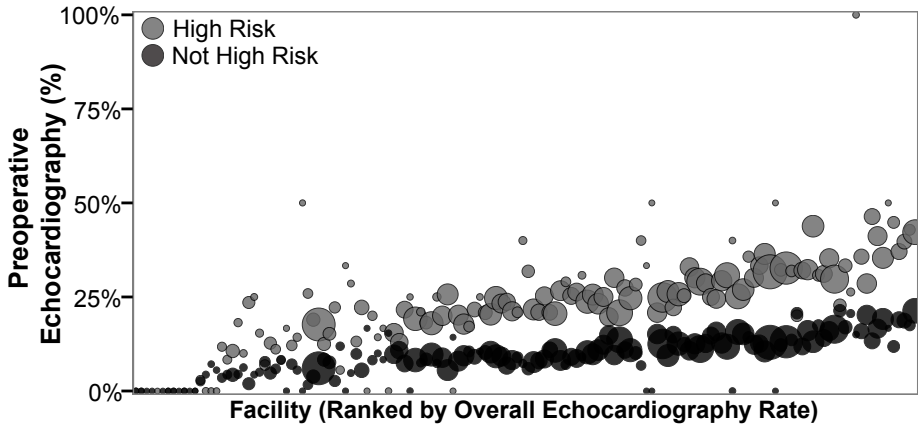

Bubble size indicates facility volume (Range 1-603)

High risk defined as recent myocardial infarction, heart failure, or valvular disease.
